# Supplementary material for: Interoception, health anxiety, and emotion regulation. psychometric properties of the original and reduced Italian versions of the multidimensional assessment of interoceptive awareness 2 (MAIA-2)
Source: Springer Nature journal article supplement (doi:10.1007/s12144-025-08938-x), 2026-01-28
Supplement: MOESM1 [file 12144_2025_8938_MOESM1_ESM.docx]

**Supplementary Materials 1**

The Italian validation of MAIA, the English version of MAIA-2 with the additional 5 items (italic font) and their adapted/translated form in MAIA-2.

|  | **MAIA**  **(Calì et al., 2015)** | **MAIA-2**  **(Mehling et al., 2018)** | **MAIA-2** |
| --- | --- | --- | --- |
| 1 | Quando sono teso noto in che punti del mio corpo è localizzata la tensione. | When I am tense, I notice where the tension is located in my body. | Quando sono teso, noto in quali punti del mio corpo la tensione si localizza. |
| 2 | Noto quando sono a disagio nel mio corpo. | I notice when I am uncomfortable in my body. | Noto quando sono a disagio nel mio corpo. |
| 3 | Noto i punti del mio corpo in cui mi sento a mio agio. | I notice where in my body I am comfortable. | Noto i punti del mio corpo in cui mi sento a mio agio. |
| 4 | Noto i cambiamenti nel mio respiro, per esempio se rallenta o accelera. | I notice changes in my breathing, such as whether it slows down. | Noto i cambiamenti nel mio respiro, per esempio se rallenta o accelera. |
| 5 | Non noto la tensione fisica o il disagio fino a quando questi non diventano più̀ seri. | I ignore physical tension or discomfort until they become more severe. | Non noto la tensione fisica o il disagio fino a quando questi non diventano più intensi. |
| 6 | Mi distolgo dalle sensazioni di disagio. | I distract myself from sensations of discomfort. | Mi distolgo dalle sensazioni di disagio. |
| 7 | Quando provo dolore o disagio, cerco comunque di andare avanti con quello che stavo facendo nonostante ciò. | When I feel pain or discomfort, I try to power through it. | Quando provo dolore o disagio, cerco comunque di andare avanti con quello che stavo facendo. |
| *8* |  | *I try to ignore pain.* | Provo ad ignorare il dolore. |
| *9* |  | *I push feelings of discomfort away by focusing on something.* | Allontano le sensazioni di fastidio focalizzandomi su qualcosa. |
| *10* |  | *When I feel unpleasant body sensations, I occupy myself with something else so I don’t have to feel them.* | Quando provo sensazioni corporee spiacevoli, mi occupo di qualcos'altro, così non devo sentirle. |
| 11 | Quando sento un dolore fisico, mi agito. | When I feel physical pain, I become upset. | Quando sento un dolore fisico, mi agito. |
| 12 | Inizio a preoccuparmi che ci sia qualcosa che non va, se percepisco un disagio. | I start to worry that something is wrong if I feel any discomfort. | Inizio a preoccuparmi che ci sia qualcosa che non va se percepisco un disagio. |
| 13 | Posso notare una sensazione corporea spiacevole senza preoccuparmene. | I can notice an unpleasant body sensation without worrying about it. | Posso notare una sensazione corporea spiacevole senza preoccuparmene. |
| *14* |  | *I can stay calm and not worry when I have feelings of discomfort or pain.* | Posso stare calmo e non preoccuparmi quando ho sensazioni di disagio o dolore. |
| *15* |  | *When I am in discomfort or pain, I can’t get it out of my mind.* | Quando sono a disagio o provo dolore non riesco a togliermelo dalla mente. |
| 16 | Posso prestare attenzione sul mio respiro senza farmi distrarre dalle cose che succedono attorno a me. | I can pay attention to my breath without being distracted by things happening around me. | Posso prestare attenzione sul mio respiro senza farmi distrarre dalle cose che succedono attorno a me. |
| 17 | Posso mantenere la consapevolezza delle mie sensazioni fisiche interiori anche se attorno a me avvengono molte cose. | I can maintain awareness of my inner bodily sensations even when there is a lot going on around me. | Posso mantenere la consapevolezza delle mie sensazioni fisiche interiori anche se attorno a me avvengono molte cose. |
| 18 | Quando sto conversando con qualcuno, riesco a prestare attenzione alla mia postura. | When I am in conversation with someone, I can pay attention to my posture. | Quando sto conversando con qualcuno, riesco a prestare attenzione alla mia postura. |
| 19 | Posso ritrovare la consapevolezza del mio corpo se sono distratto. | I can return awareness to my body if I am distracted. | Posso ritrovare la consapevolezza del mio corpo se sono distratto. |
| 20 | Riesco a ridirezionare l’attenzione dall’atto di pensare all’atto di percepire il mio corpo. | I can refocus my attention from thinking to sensing my body. | Riesco a spostare la mia attenzione dal “pensare” al “sentire” il mio corpo. |
| 21 | Riesco a mantenere la consapevolezza del mio corpo nella sua interezza anche quando una parte di me è dolorante o a disagio. | I can maintain awareness of my whole body even when a part of me is in pain or discomfort. | Riesco a mantenere la consapevolezza del mio corpo nella sua interezza anche quando una parte di me è dolorante o a disagio. |
| 22 | Sono capace di focalizzarmi intenzionalmente sul mio corpo nella sua interezza. | I am able to consciously focus on my body as a whole. | Sono capace di focalizzarmi intenzionalmente sul mio corpo nella sua interezza. |
| 23 | Noto in che modo il mio corpo cambia quando sono arrabbiato. | I notice how my body changes when I am angry. | Noto in che modo il mio corpo cambia quando sono arrabbiato. |
| 24 | Quando qualcosa va storto nella mia vita, riesco a percepirlo nel mio corpo. | When something is wrong in my life I can feel it in my body. | Quando qualcosa va storto nella mia vita, riesco a percepirlo nel mio corpo. |
| 25 | Noto di sentire il mio corpo diverso dopo un’esperienza serena. | I notice that my body feels different after a peaceful experience. | Noto di sentire il mio corpo diverso dopo un’esperienza serena. |
| 26 | Noto che il mio respiro diventa libero e agevole quando mi sento a mio agio. | I notice that my breathing becomes free and easy when I feel comfortable. | Noto che il mio respiro diventa libero e agevole quando mi sento a mio agio. |
| 27 | Noto come il mio corpo cambia quando mi sento felice/gioioso. | I notice how my body changes when I feel happy/joyful. | Noto come il mio corpo cambia quando mi sento felice/gioioso. |
| 28 | Quando mi sento sopraffatto, riesco a trovare dentro di me un posto tranquillo. | When I feel overwhelmed I can find a calm place inside. | Quando mi sento sopraffatto, riesco a trovare dentro di me un posto tranquillo. |
| 29 | Quando rivolgo la consapevolezza sul mio corpo, provo un senso di calma. | When I bring awareness to my body I feel a sense of calm. | Quando rivolgo la consapevolezza sul mio corpo, provo un senso di calma. |
| 30 | Riesco ad utilizzare il mio respiro per ridurre la tensione. | I can use my breath to reduce tension. | Riesco ad utilizzare il mio respiro per ridurre la tensione. |
| 31 | Quando mi assalgono i pensieri, posso calmare la mente concentrandomi sul mio corpo/respiro. | When I am caught up in thoughts, I can calm my mind by focusing on my body/breathing. | Quando mi assalgono i pensieri, posso calmare la mente concentrandomi sul mio corpo/respiro. |
| 32 | Ascolto le informazioni provenienti dal mio corpo riguardanti i miei stati emotivi. | I listen for information from my body about my emotional state. | Ascolto le informazioni provenienti dal mio corpo sul mio stato emotivo. |
| 33 | Quando sono agitato, prendo il tempo necessario per indagare come sta il mio corpo. | When I am upset, I take time to explore how my body feels. | Quando sono agitato, prendo il tempo necessario per indagare come sta il mio corpo. |
| 34 | Ascolto il mio corpo per sapere cosa fare. | I listen to my body to inform me about what to do. | Ascolto il mio corpo per sapere cosa fare. |
| 35 | Nel mio corpo mi sento a casa. | I am at home in my body. | Nel mio corpo mi sento a casa. |
| 36 | Sento che il mio corpo è un posto sicuro. | I feel my body is a safe place. | Sento che il mio corpo è un posto sicuro. |
| 37 | Mi fido delle sensazioni del mio corpo. | I trust my body sensations. | Mi fido delle sensazioni del mio corpo. |

**Supplementary Materials 2.**

**Italian version of original 37-item MAIA-2**

**English instructions:**

Below you will find a list of statements. Please indicate how often each statement applies to you generally in daily life.

**Italian instructions:**

Di seguito troverai una lista di affermazioni. Per favore indica quanto spesso ciascuna affermazione si riferisce generalmente alla tua vita quotidiana.

| Item | Risposte |
| --- | --- |
| 1. Quando sono teso, noto in quali punti del mio corpo la tensione si localizza | Mai 0 1 2 3 4 5 Sempre |
| 1. Noto quando sono a disagio nel mio corpo | Mai 0 1 2 3 4 5 Sempre |
| 1. Noto i punti del mio corpo in cui mi sento a mio agio | Mai 0 1 2 3 4 5 Sempre |
| 1. Noto i cambiamenti nel mio respiro, per esempio se rallenta o accelera | Mai 0 1 2 3 4 5 Sempre |
| 1. Non noto la tensione fisica o il disagio fino a quando questi non diventano più intensi | Mai 0 1 2 3 4 5 Sempre |
| 1. Mi distolgo dalle sensazioni di disagio | Mai 0 1 2 3 4 5 Sempre |
| 1. Quando provo dolore o disagio, cerco comunque di andare avanti con quello che stavo facendo | Mai 0 1 2 3 4 5 Sempre |
| 1. Provo ad ignorare il dolore | Mai 0 1 2 3 4 5 Sempre |
| 1. Allontano le sensazioni di fastidio focalizzandomi su qualcosa | Mai 0 1 2 3 4 5 Sempre |
| 1. Quando provo sensazioni corporee spiacevoli, mi occupo di qualcos'altro, così non devo sentirle | Mai 0 1 2 3 4 5 Sempre |
| 1. Quando sento un dolore fisico, mi agito | Mai 0 1 2 3 4 5 Sempre |
| 1. Inizio a preoccuparmi che ci sia qualcosa che non va se percepisco un disagio | Mai 0 1 2 3 4 5 Sempre |
| 1. Posso notare una sensazione corporea spiacevole senza preoccuparmene | Mai 0 1 2 3 4 5 Sempre |
| 1. Posso stare calmo e non preoccuparmi quando ho sensazioni di disagio o dolore | Mai 0 1 2 3 4 5 Sempre |
| 1. Quando sono a disagio o provo dolore non riesco a togliermelo dalla mente | Mai 0 1 2 3 4 5 Sempre |
| 1. Posso prestare attenzione sul mio respiro senza farmi distrarre dalle cose che succedono attorno a me | Mai 0 1 2 3 4 5 Sempre |
| 1. Posso mantenere la consapevolezza delle mie sensazioni fisiche interiori anche se attorno a me avvengono molte cose | Mai 0 1 2 3 4 5 Sempre |
| 1. Quando sto conversando con qualcuno, riesco a prestare attenzione alla mia postura | Mai 0 1 2 3 4 5 Sempre |
| 1. Posso ritrovare la consapevolezza del mio corpo se sono distratto | Mai 0 1 2 3 4 5 Sempre |
| 1. Riesco a spostare la mia attenzione dal “pensare” al “sentire” il mio corpo | Mai 0 1 2 3 4 5 Sempre |
| 1. Riesco a mantenere la consapevolezza del mio corpo nella sua interezza anche quando una parte di me è dolorante o a disagio | Mai 0 1 2 3 4 5 Sempre |
| 1. Sono capace di focalizzarmi intenzionalmente sul mio corpo nella sua interezza | Mai 0 1 2 3 4 5 Sempre |
| 1. Noto in che modo il mio corpo cambia quando sono arrabbiato | Mai 0 1 2 3 4 5 Sempre |
| 1. Quando qualcosa va storto nella mia vita, riesco a percepirlo nel mio corpo | Mai 0 1 2 3 4 5 Sempre |
| 1. Noto di sentire il mio corpo diverso dopo un’esperienza serena | Mai 0 1 2 3 4 5 Sempre |
| 1. Noto che il mio respiro diventa libero e agevole quando mi sento a mio agio | Mai 0 1 2 3 4 5 Sempre |
| 1. Noto come il mio corpo cambia quando mi sento felice/gioioso | Mai 0 1 2 3 4 5 Sempre |
| 1. Quando mi sento sopraffatto, riesco a trovare dentro di me un posto tranquillo | Mai 0 1 2 3 4 5 Sempre |
| 1. Quando rivolgo la consapevolezza sul mio corpo, provo un senso di calma | Mai 0 1 2 3 4 5 Sempre |
| 1. Riesco ad utilizzare il mio respiro per ridurre la tensione | Mai 0 1 2 3 4 5 Sempre |
| 1. Quando mi assalgono i pensieri, posso calmare la mente concentrandomi sul mio corpo/respiro | Mai 0 1 2 3 4 5 Sempre |
| 1. Ascolto le informazioni provenienti dal mio corpo sul mio stato emotivo | Mai 0 1 2 3 4 5 Sempre |
| 1. Quando sono agitato, prendo il tempo necessario per indagare come sta il mio corpo | Mai 0 1 2 3 4 5 Sempre |
| 1. Ascolto il mio corpo per sapere cosa fare | Mai 0 1 2 3 4 5 Sempre |
| 1. Nel mio corpo mi sento a casa | Mai 0 1 2 3 4 5 Sempre |
| 1. Sento che il mio corpo è un posto sicuro | Mai 0 1 2 3 4 5 Sempre |
| 1. Mi fido delle sensazioni del mio corpo | Mai 0 1 2 3 4 5 Sempre |

**Scoring Instructions for original version**

| **Scoring Instructions** | **Istruzioni per lo scoring** |
| --- | --- |
| Take the average of the items on each scale.  **Note: (R): reverse-score (5 – x) items 5, 6, 7, 8, 9 and 10 on Not-Distracting, and items 11, 12 and 15 on Not- Worrying.**   1. **Noticing:** Awareness of uncomfortable, comfortable, and neutral body sensations   Q1 + Q2 +Q3 +Q4 / 4 =   1. **Not-Distracting:** Tendency not to ignore or distract oneself from sensations of pain or discomfort   Q5(**R)** + Q6**(R)** +Q7**(R)** +Q8**(R)** +Q9**(R)** +Q10**(R)** / 6 =   1. **Not-Worrying:** Tendency not to worry or experience emotional distress with sensations of pain or discomfort   Q11**(R)** + Q12**(R)** + Q13+ Q14 +Q15**(R)** / 5 =   1. **Attention Regulation:** Ability to sustain and control attention to body sensations   Q16+ Q17 + Q18+ Q19+ Q20+ Q21+ Q22/ 7 =   1. **Emotional Awareness:** Awareness of the connection between body sensations and emotional states   Q23+ Q24+ Q25+ Q26+ Q27/ 5 =   1. **Self-Regulation:** Ability to regulate distress by attention to body sensations   Q28+ Q29+ Q30+ Q31/ 4 =   1. **Body Listening:** Active listening to the body for insight   Q32+ Q33+ Q34/ 3=   1. **Trusting:** Experience of one’s body as safe and trustworthy   Q35+ Q36+ Q37/ 3= | Calcolare la media degli items di ciascuna scala.  **Attenzione: invertire il punteggio (5 - x) degli items 5, 6, 7, 8, 9 e 10 per la scala Not-Distracting, e gli items 11, 12 e 15 per la scala Not-Worrying.**   1. **Noticing**: consapevolezza delle sensazioni corporee spiacevoli, piacevoli e neutre   Q1 + Q2 + Q3 + Q4 / 4 =   1. **Not-Distracting:** Tendenza a non ignorare o distrarsi dalle sensazioni di dolore o disagio   Q5(**R)** + Q6**(R)** +Q7**(R)** +Q8**(R)** +Q9**(R)** +Q10**(R)** / 6 =   1. **Not-Worrying:** Tendenza a non preoccuparsi o esperire sofferenza emotiva in presenza di sensazioni di dolore o disagio   Q11**(R)** + Q12**(R)** + Q13+ Q14 +Q15**(R)** / 5 =   1. **Attention Regulation**: Abilità di sostenere e controllare l’attenzione verso le sensazioni corporee   Q16+ Q17 + Q18+ Q19+ Q20+ Q21+ Q22/ 7 =   1. **Emotional Awareness:** Consapevolezza della connessione tra sensazioni corporee e stati emotive   Q23+ Q24+ Q25+ Q26+ Q27/ 5 =   1. **Self-Regulation:** Abilità di regolare la sofferenza emotiva prestando attenzione alle sensazioni corporee   Q28+ Q29+ Q30+ Q31/ 4 =   1. **Body Listening:** Ascolto attivo del corpo per insight   Q32+ Q33+ Q34/ 3=   1. **Trusting:** Vissuto del proprio corpo come sicuro e affidabile   Q35+ Q36+ Q37/ 3= |

**Supplementary Materials 3.**

Inter-Factor Correlations: values marked with an asterisk (*) are statistically significant (p < .001).

|  | N | ND | NW | AR | EA | SR | BL | T |
| --- | --- | --- | --- | --- | --- | --- | --- | --- |
| **Noticing** | - | 0.144* | 0.241* | 0.453* | 0.707* | 0.289* | 0.587* | 0.175* |
| **Not Distracting** | 0.144* | - | -0.257* | 0.260* | 0.135* | 0.210* | 0.101* | 0.026 |
| **Not Worrying** | 0.241* | -0.257* | - | -0.276* | 0.201* | -0.168* | 0.093* | -0.125* |
| **Attention Regulation** | 0.453* | 0.260* | -0.276* | - | 0.412* | 0.529* | 0.582* | 0.463* |
| **Emotional Awareness** | 0.707* | 0.135* | 0.201* | 0.412* | - | 0.403* | 0.593* | 0.298* |
| **Self-Regulation** | 0.289* | 0.210* | -0.168* | 0.529* | 0.403* | - | 0.623* | 0.528* |
| **Body Listening** | 0.587* | 0.101* | 0.093* | 0.582* | 0.593* | 0.623* | - | 0.553* |
| **Trusting** | 0.175* | 0.026 | -0.125* | 0.463* | 0.298* | 0.528* | 0.553* | - |

**Supplementary Materials 4**

**Italian version of 19-item MAIA-2**

**English instructions:**

Below you will find a list of statements. Please indicate how often each statement applies to you generally in daily life.

**Italian instructions:**

Di seguito troverai una lista di affermazioni. Per favore indica quanto spesso ciascuna affermazione si riferisce generalmente alla tua vita quotidiana.

| Item | Risposte |
| --- | --- |
| 1. Quando provo dolore o disagio, cerco comunque di andare avanti con quello che stavo facendo | Mai 0 1 2 3 4 5 Sempre |
| 1. Provo ad ignorare il dolore | Mai 0 1 2 3 4 5 Sempre |
| 1. Allontano le sensazioni di fastidio focalizzandomi su qualcosa | Mai 0 1 2 3 4 5 Sempre |
| 1. Quando provo sensazioni corporee spiacevoli, mi occupo di qualcos'altro, così non devo sentirle | Mai 0 1 2 3 4 5 Sempre |
| 1. Quando sento un dolore fisico, mi agito | Mai 0 1 2 3 4 5 Sempre |
| 1. Inizio a preoccuparmi che ci sia qualcosa che non va se percepisco un disagio | Mai 0 1 2 3 4 5 Sempre |
| 1. Posso notare una sensazione corporea spiacevole senza preoccuparmene | Mai 0 1 2 3 4 5 Sempre |
| 1. Quando sono a disagio o provo dolore non riesco a togliermelo dalla mente | Mai 0 1 2 3 4 5 Sempre |
| 1. Posso prestare attenzione sul mio respiro senza farmi distrarre dalle cose che succedono attorno a me | Mai 0 1 2 3 4 5 Sempre |
| 1. Posso mantenere la consapevolezza delle mie sensazioni fisiche interiori anche se attorno a me avvengono molte cose | Mai 0 1 2 3 4 5 Sempre |
| 1. Posso ritrovare la consapevolezza del mio corpo se sono distratto | Mai 0 1 2 3 4 5 Sempre |
| 1. Riesco a mantenere la consapevolezza del mio corpo nella sua interezza anche quando una parte di me è dolorante o a disagio | Mai 0 1 2 3 4 5 Sempre |
| 1. Sono capace di focalizzarmi intenzionalmente sul mio corpo nella sua interezza | Mai 0 1 2 3 4 5 Sempre |
| 1. Noto di sentire il mio corpo diverso dopo un’esperienza serena | Mai 0 1 2 3 4 5 Sempre |
| 1. Noto che il mio respiro diventa libero e agevole quando mi sento a mio agio | Mai 0 1 2 3 4 5 Sempre |
| 1. Noto come il mio corpo cambia quando mi sento felice/gioioso | Mai 0 1 2 3 4 5 Sempre |
| 1. Nel mio corpo mi sento a casa | Mai 0 1 2 3 4 5 Sempre |
| 1. Sento che il mio corpo è un posto sicuro | Mai 0 1 2 3 4 5 Sempre |
| 1. Mi fido delle sensazioni del mio corpo | Mai 0 1 2 3 4 5 Sempre |

**Scoring Instructions for 19-item reduced version**

| **Scoring Instructions** | **Istruzioni per lo scoring** |
| --- | --- |
| Take the average of the items on each scale.  **Note: (R): reverse-score (5 – x) items 1, 2, 3 and 4 for the Not-Distracting scale, and items 5, 6 and 8 for the Not-Worrying scale.**   1. **Not-Distracting:** Tendency not to ignore or distract oneself from sensations of pain or discomfort   Q1**(R)** + Q2**(R)** +Q3**(R)** +Q4**(R)** / 4 =   1. **Not-Worrying:** Tendency not to worry or experience emotional distress with sensations of pain or discomfort   Q5**(R)** + Q6**(R)** + Q7+ Q8 **(R)** / 4 =   1. **Attention Regulation:** Ability to sustain and control attention to body sensations   Q9+ Q10 + Q11+ Q12+ Q13/ 5 =   1. **Emotional Awareness:** Awareness of the connection between body sensations and emotional states   Q14+ Q15+ Q16/ 3 =   1. **Trusting:** Experience of one’s body as safe and trustworthy   Q17+ Q18+ Q19/ 3= | Calcolare la media degli items di ciascuna scala.  **Attenzione: invertire il punteggio (5 - x) degli items 1, 2, 3 e 4 per la scala Not-Distracting, e gli items 5, 6 e 8 per la scala Not-Worrying.**   1. **Not-Distracting:** Tendenza a non ignorare o distrarsi dalle sensazioni di dolore o disagio   Q1**(R)** + Q2**(R)** +Q3**(R)** +Q4**(R)** / 4 =   1. **Not-Worrying:** Tendenza a non preoccuparsi o esperire sofferenza emotiva in presenza di sensazioni di dolore o disagio   Q5**(R)** + Q6**(R)** + Q7+ Q8 **(R)** / 4 =   1. **Attention Regulation**: Abilità di sostenere e controllare l’attenzione verso le sensazioni corporee   Q9+ Q10 + Q11+ Q12+ Q13/ 5 =   1. **Emotional Awareness:** Consapevolezza della connessione tra sensazioni corporee e stati emotive   Q14+ Q15+ Q16/ 3 =   1. **Trusting:** Vissuto del proprio corpo come sicuro e affidabile   Q17+ Q18+ Q19/ 3= |

**Supplementary Materials 5**

Table 1S. *Variance and model fit indices of the original 37-item and the reduced 19-item versions of the Italian MAIA-2*

| Property | 37-item version | 19-item version |
| --- | --- | --- |
| Explained variance (%) | 45.2% | 56.4% |
| χ²/df | 2.88 | 2.41 |
| CFI | .911 | .944 |
| TLI | .902 | .932 |
| RMSEA [90% CI] | .058 [.054–.062] | .049 [.045–.054] |
| SRMR | .061 | .048 |

Table 2S.*Internal consistency and test–retest reliability coefficients of the original 37-item and the reduced 19-item versions of the Italian MAIA-2 for each scale.*

| **Subscale** | **ω (37-item)** | **ω (19-item)** | **ICC**  **(37-item)** | **ICC**  **(19-item)** |
| --- | --- | --- | --- | --- |
| Not Distracting | .81 | .78 | .70 | .74 |
| Not Worrying | .85 | .82 | .76 | .80 |
| Attention Regulation | .88 | .89 | .83 | .87 |
| Emotional Awareness | .84 | .83 | .82 | .85 |
| Trusting | .89 | .91 | .86 | .89 |

Table 3S. *Correlational data (r value) for the MAIA-2 scores and PHLMS*

|  | **MAIA-2** | | | | |
| --- | --- | --- | --- | --- | --- |
| **PHLMS** | ND | NW | AR | EA | T |
| AW | .09 | -.01 | .50** | .35** | .40** |
| ACC | .35** | .29** | .21** | -.03 | .32** |

ACC: Acceptance: AR: Attention-Regulation; AW: Awareness; EA: Emotional-Awareness; ND: Not-Distracting; NW: Not-Worrying; T: Trust. * .01; ** .05
